# Supplementary material for: Co-gel strategy for preparing hierarchically porous silica/polyimide nanocomposite aerogel with thermal insulation and flame retardancy
Source: Royal Society of Chemistry journal article supplement (doi:10.1039/c9ta13011j), 2020-01-01
Supplement: c9ta13011j1.pdf [file c9ta13011j1.pdf]

## Supplementary Information

1

2

### 3 **Co-gel strategy for preparing hierarchically porous silica/polyimide** 4 **nanocomposite aerogel with thermal insulation and flame retardancy**

5 Xinhai Zhang,<sup>a</sup> Xingxing Ni,<sup>a</sup> Chenxi Li,<sup>a</sup> Bo You,<sup>\*a</sup> and Gang Sun<sup>b</sup>

6

7 <sup>a</sup> Department of Materials Science, Advanced Coatings Research Center of Ministry  
8 of Education of China, Fudan University, Shanghai 200433, People's Republic of  
9 China.

10 <sup>b</sup> Department of Aeronautics and Astronautics, Fudan University, Shanghai 200433,  
11 People's Republic of China.

12 □ Corresponding author: Bo You

13 □ Corresponding Author E-mail: [youbu@fudan.edu.cn](mailto:youbu@fudan.edu.cn)

14

15

16

17

18

19

20

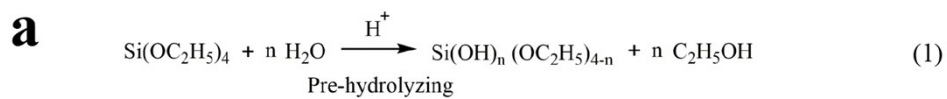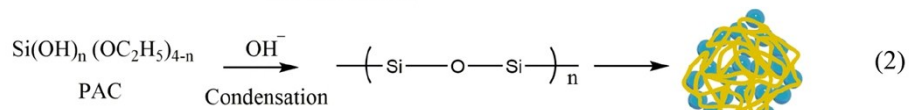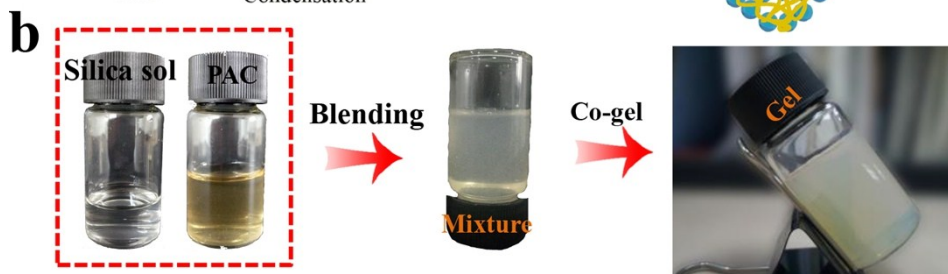

21

22 **Figure S1.** (a) Hydrolysis process for tetraethyl orthosilicate (TEOS,  $n \geq 2$ ), (b) Digital images of

23 the *in situ* generated silica/PAC co-gel.

24

25

26

27

28

29

30

31

32

33

34

35

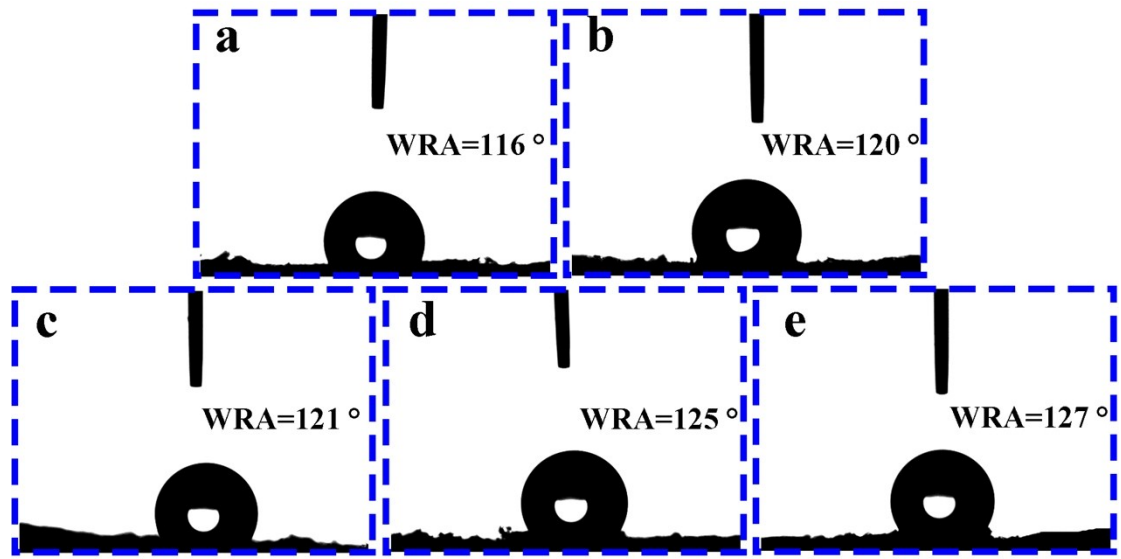

36

37 **Figure S2.** Water contact angle (WRA) of PI and SiO<sub>2</sub>/PI-n aerogels. (a) PI aerogel. (b) SiO<sub>2</sub>/PI-1

38 aerogel. (c) SiO<sub>2</sub>/PI-2 aerogel. (d) SiO<sub>2</sub>/PI-3 aerogel. (e) SiO<sub>2</sub>/PI-4 aerogel.

39

40

41

42

43

44

45

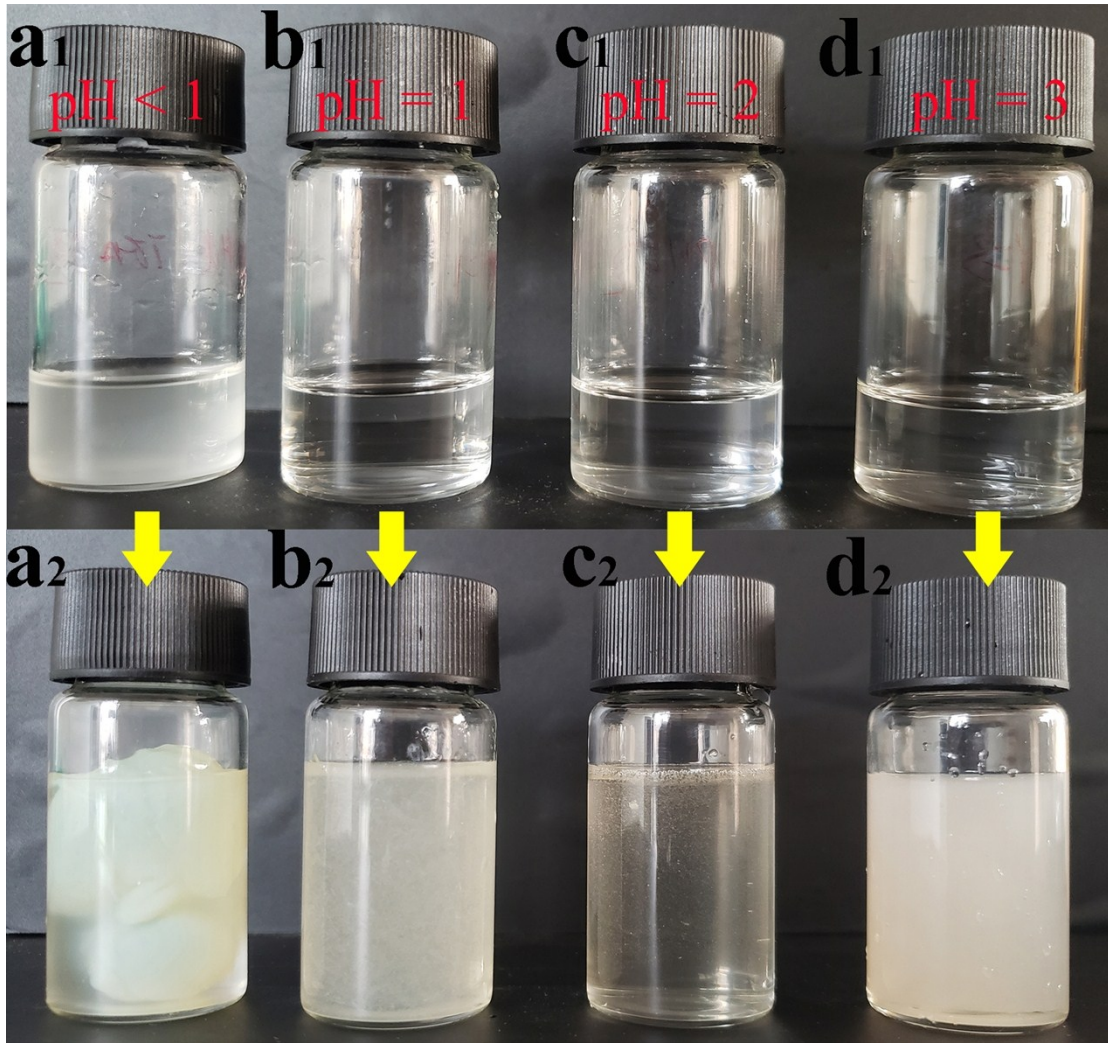

46

47 **Figure S3.** Digital images hydrolysate of TEOS under different pH value conditions and Digital

48 images of the mixture of PAC and hydrolysate of TEOS correspondently. (a<sub>1</sub> and a<sub>2</sub>) Hydrolysis

49 pH value of TEOS is lower than 1. (b<sub>1</sub> and b<sub>2</sub>) Hydrolysis pH value of TEOS is 1. (c<sub>1</sub> and c<sub>2</sub>)

50 Hydrolysis pH value of TEOS is 2. (d<sub>1</sub> and d<sub>2</sub>) Hydrolysis pH value of TEOS is 3.

51

52

53

54

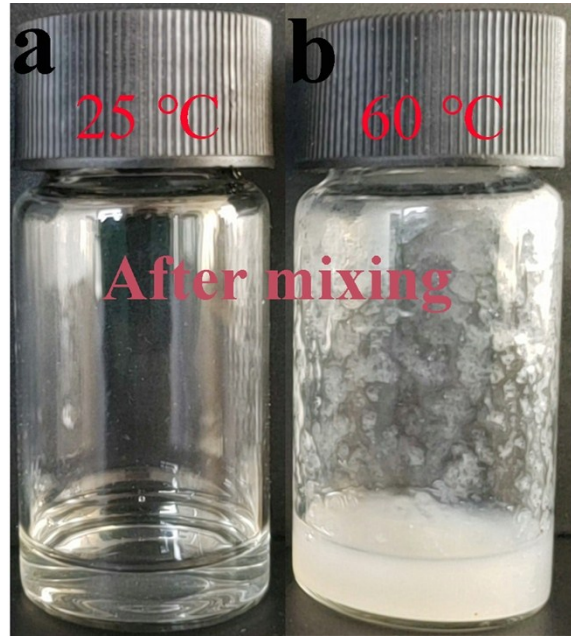

55

56 **Figure S4.** Digital images of the mixture of water-soluble PAC and hydrolysate of TEOS under  
57 different temperature conditions. (a) Hydrolysis temperature of TEOS is 25 °C. (b) Hydrolysis  
58 temperature of TEOS is 60 °C.

59

60

61

62

63

64

65

66

67

68

69

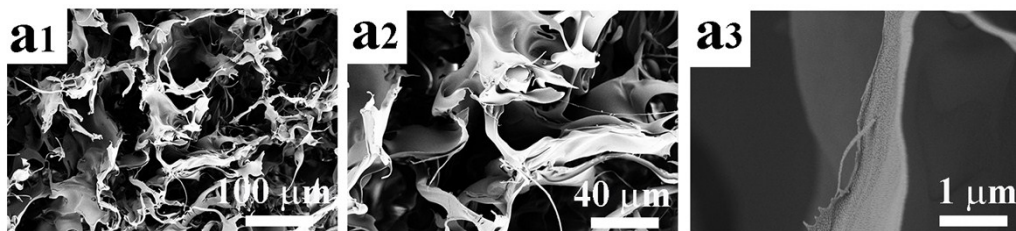

70

71 **Figure S5.** Morphology images of PI aerogel. The PI aerogel showed a disordered honeycombs-

72 like porous structure and the wall of the pores exhibited smooth.

73

74

75

76

77

78

79

80

81

82

83

84

85

86

87

88

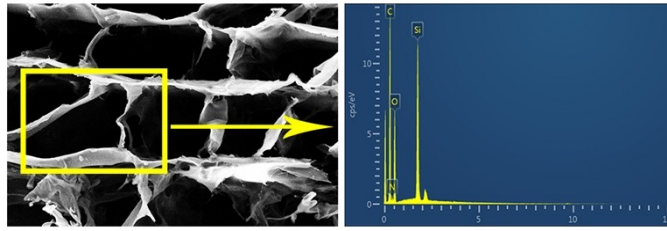

89

90 **Figure S6.** Morphology image of SiO<sub>2</sub>/PI-3 aerogel for EDS mapping.

91

92

93

94

95

96

97

98

99

100

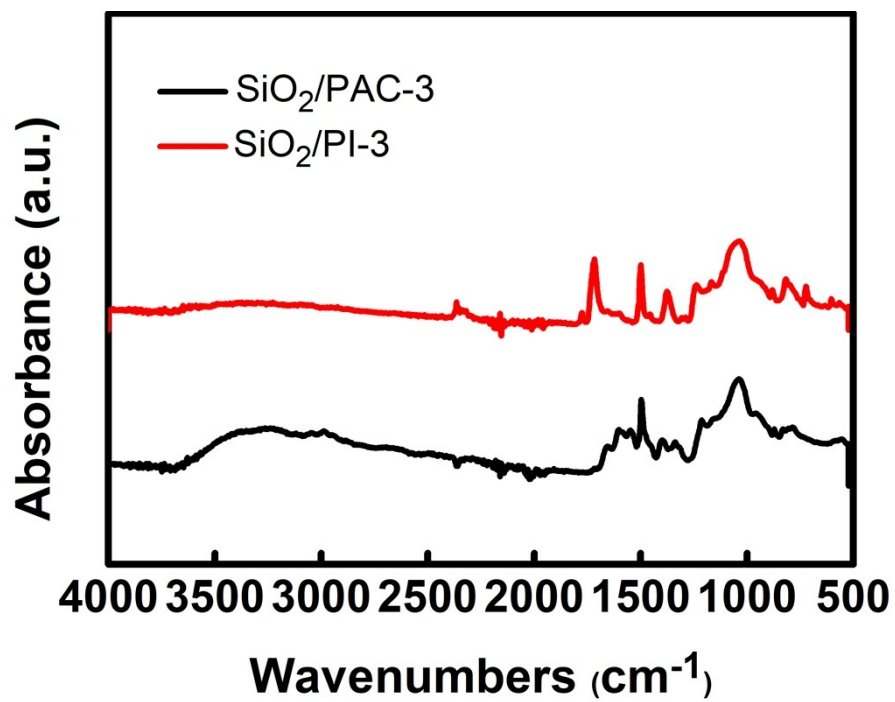

101

102 **Figure S7.** FTIR spectra of the SiO<sub>2</sub>/PAC-3 and SiO<sub>2</sub>/PI-3 aerogels.

103

104

105

106

107

108

109

110

111

112

113

114

115



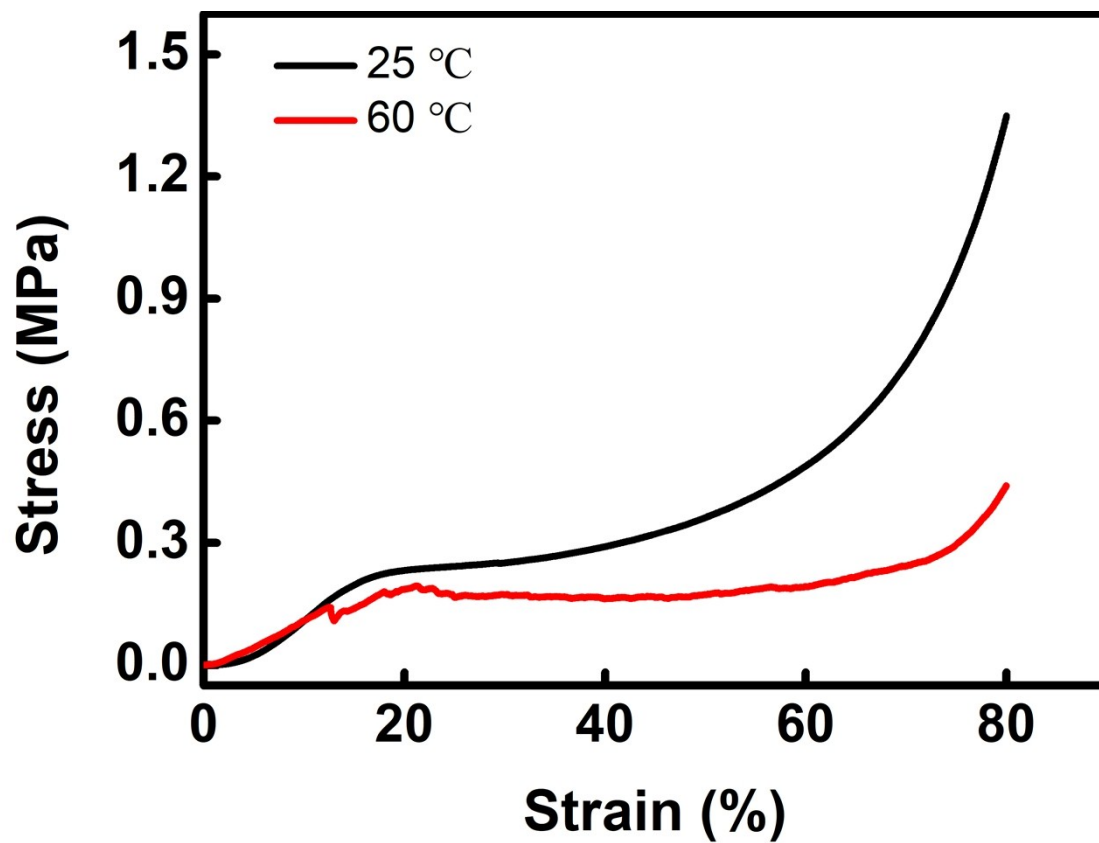

116

117 **Figure S8.** Compressive stress-strain ( $\delta$ - $\epsilon$ ) curves of SiO<sub>2</sub>/PI-3 and SiO<sub>2</sub>/PI-3-60 aerogels.

118

119

120

121

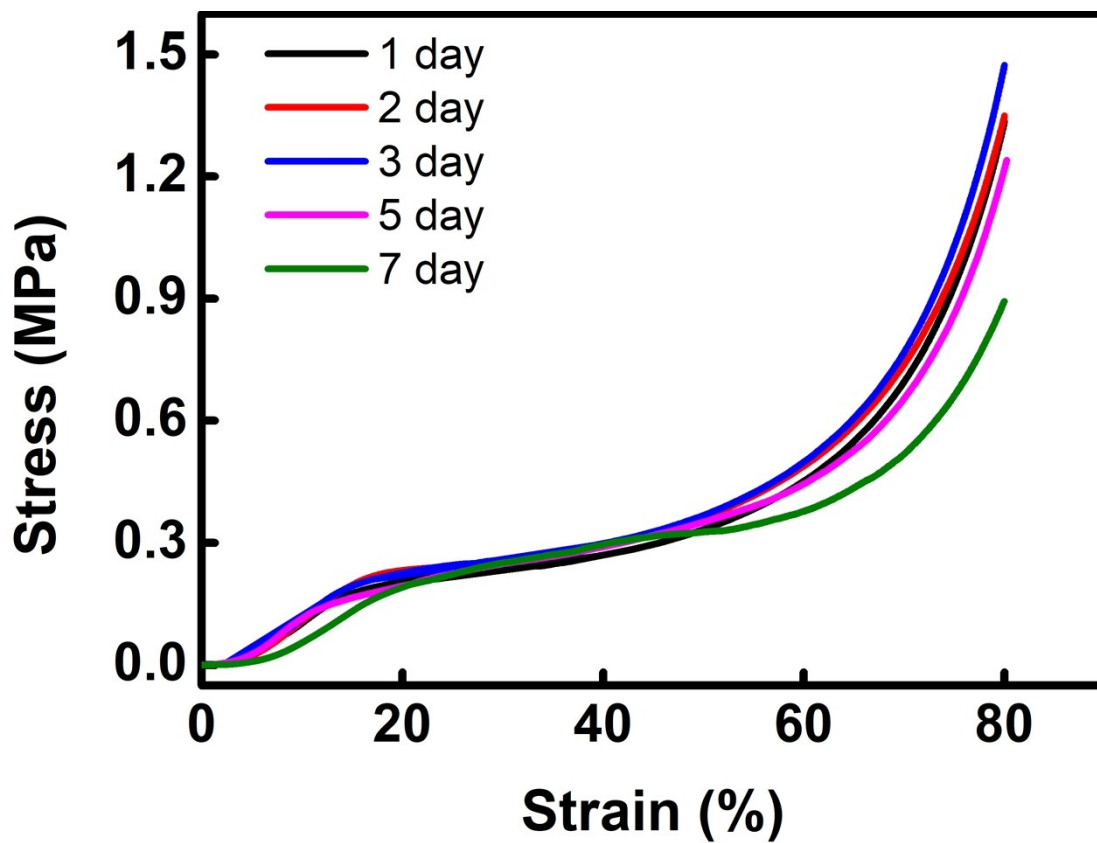

122

123 **Figure S9.** Compressive stress-strain ( $\delta$ - $\epsilon$ ) curves of SiO<sub>2</sub>/PI-3, SiO<sub>2</sub>/PI-3-1D, SiO<sub>2</sub>/PI-3-3D,

124 SiO<sub>2</sub>/PI-3-5D, and SiO<sub>2</sub>/PI-3-7D aerogels.

125

126

127

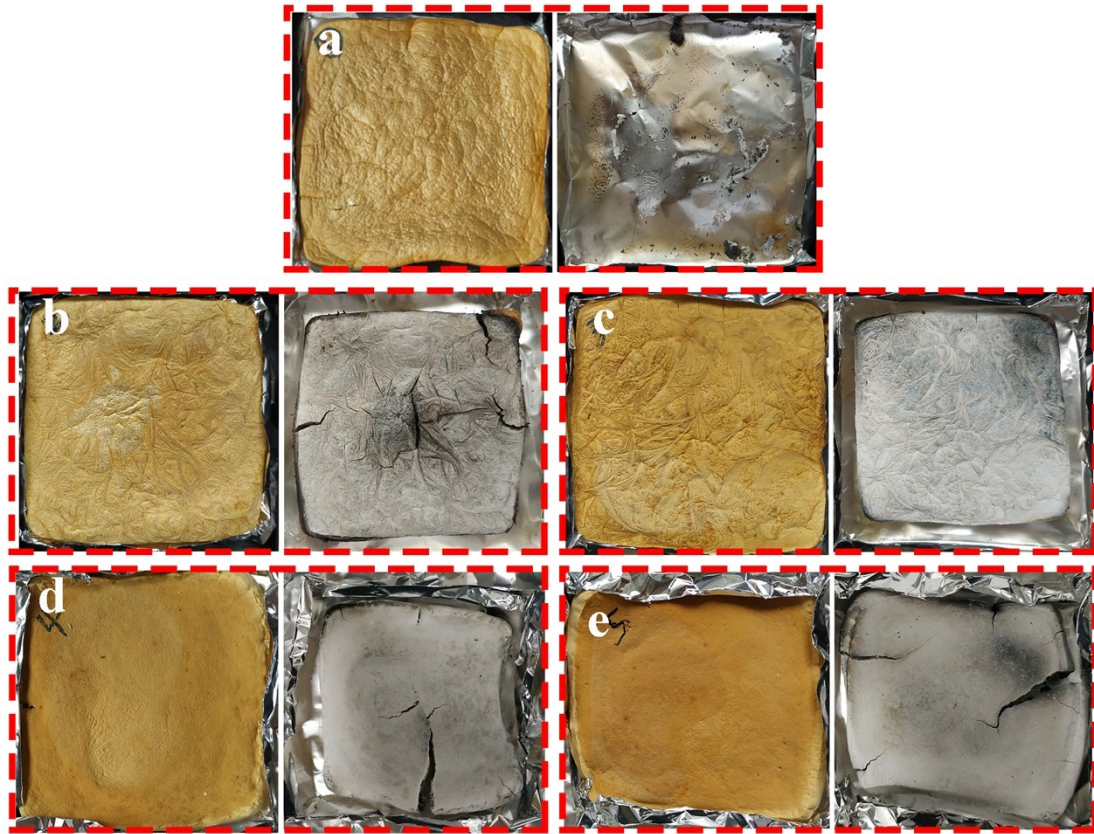

128

129 **Figure S10.** Digital images of pre-test and post-test of samples for flame. (a) PI aerogel. (b)

130 SiO<sub>2</sub>/PI-1 aerogel. (c) SiO<sub>2</sub>/PI-2 aerogel. (d) SiO<sub>2</sub>/PI-3 aerogel. (e) SiO<sub>2</sub>/PI-4 aerogel.

131

132

133

134

135

136

137

138

139

140

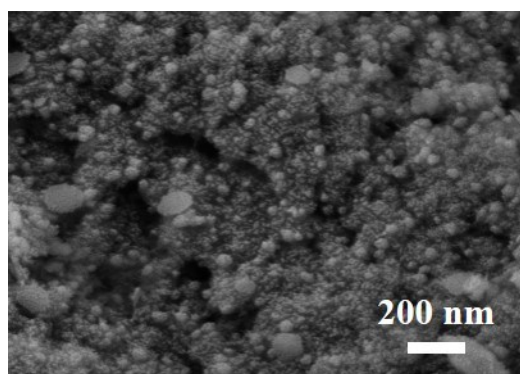

141

142 **Figure S11.** The morphology of the SiO<sub>2</sub>/PI aerogel after burned.

143

144

145

146

147

148

149

150

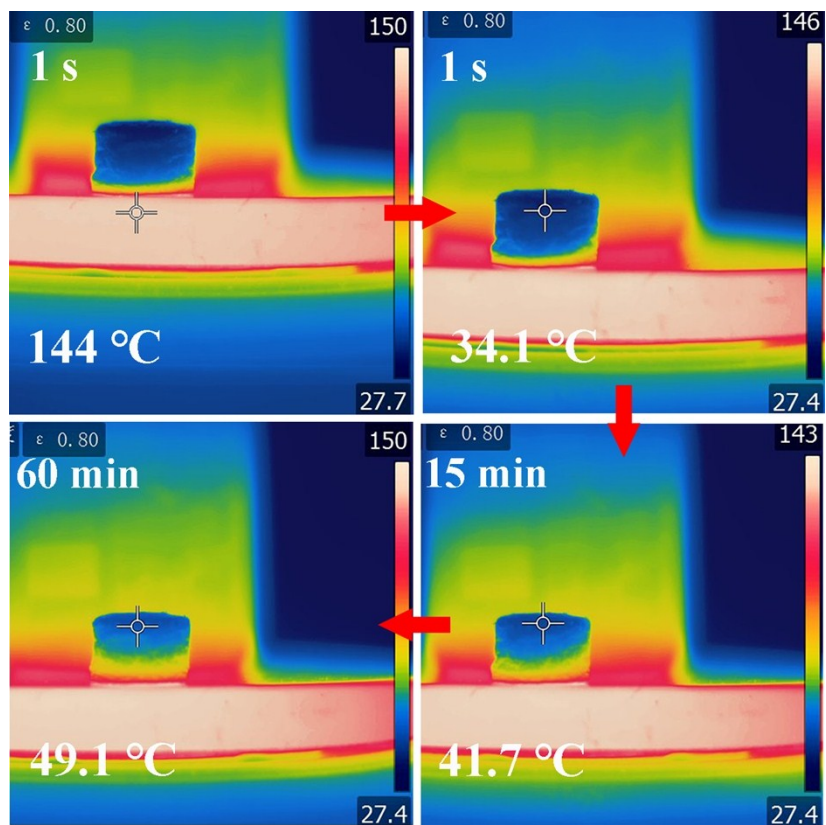

151

152 **Figure S12.** Infrared images of PI aerogel on a 144 °C heating stage.

153

154

155

156

157

158

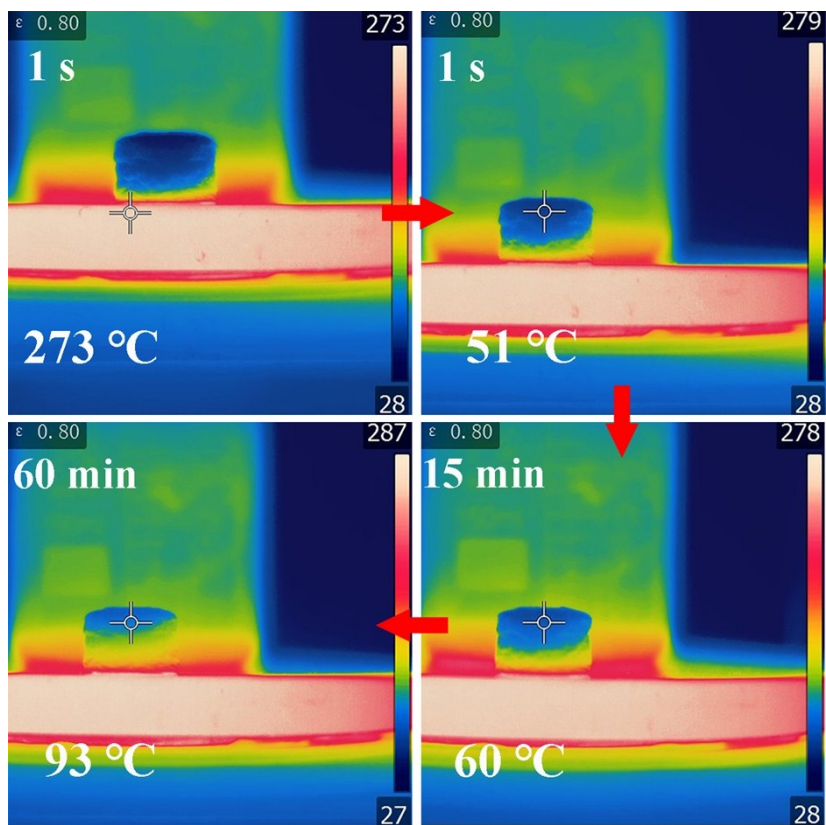

159

160 **Figure S13.** Infrared images of PI aerogel on a 273 °C heating stage.

161

162

163

164

165

166

167

168

169

170

171

172 **Table S1.** The detailed variable information for preparing silica/polyimide composite aerogels and  
 173 the sample names.

| Sample                    | TEOS (g) | pH value (water) | Hydrolysis temperature | Hydrolysis time |
|---------------------------|----------|------------------|------------------------|-----------------|
|                           |          |                  | (°C)                   | (day)           |
| SiO <sub>2</sub> /PI-1    | 0.348    | 2                | 25                     | 2               |
| SiO <sub>2</sub> /PI-2    | 0.696    | 2                | 25                     | 2               |
| SiO <sub>2</sub> /PI-3    | 1.044    | 2                | 25                     | 2               |
| SiO <sub>2</sub> /PI-4    | 1.392    | 2                | 25                     | 2               |
| —                         | 1.044    | < 1              | 25                     | 2               |
| —                         | 1.044    | 1                | 25                     | 2               |
| —                         | 1.044    | 2                | 25                     | 2               |
| —                         | 1.044    | 3                | 25                     | 2               |
| SiO <sub>2</sub> /PI-3-60 | 1.044    | 2                | 60                     | 2               |
| SiO <sub>2</sub> /PI-3-1D | 1.044    | 2                | 25                     | 1               |
| SiO <sub>2</sub> /PI-3-3D | 1.044    | 2                | 25                     | 3               |
| SiO <sub>2</sub> /PI-3-5D | 1.044    | 2                | 25                     | 5               |
| SiO <sub>2</sub> /PI-3-7D | 1.044    | 2                | 25                     | 7               |

174

175

176

177

178

179 **Table S2.** Comparison of flame retardant of various organic and inorganic composite flame-  
 180 resistant materials.

| Sample                         | LOI  | Heat flux<br>(kW m <sup>-2</sup> ) | PHRR<br>(kW m <sup>-2</sup> ) | TPHRR<br>(s) | FIGRA<br>(W s) | THR<br>(MJ m <sup>2</sup> ) | TSR<br>(m <sup>2</sup> m <sup>-2</sup> ) | Ref.                 |
|--------------------------------|------|------------------------------------|-------------------------------|--------------|----------------|-----------------------------|------------------------------------------|----------------------|
| M5Pe5                          | 35   | 50                                 | 80.1                          | 65           | 1.2            | 19.7                        | ~                                        | 1                    |
| PC/TiO <sub>2</sub> @DPP5<br>0 | 29.7 | 50                                 | 412                           | 65           | 6.3            | 20.5                        | ~                                        | 2                    |
| RPUF-15                        | ~    | 35                                 | 265.9                         | 35           | 7.6            | 12.2                        |                                          | 3                    |
| PU/Aerogel -0.7                | 60   | 50                                 | 220                           | 36           | 6.3            | 19                          | 964                                      | 4                    |
| PSi-70                         | ~    | 35                                 | 19                            | ~            | ~              | 0.55                        | ~                                        | 5                    |
| FPU/Alag-20                    | ~    | 50                                 | 71                            | 14           | 5.1            | 3.8                         | 38                                       | 6                    |
| PMMA/GAPPA                     | 25   | 50                                 | 76                            | ~            | ~              | 6.9                         | ~                                        | 7                    |
| PI/G5/M10                      | 55   | 50                                 | 52.5                          | 52.5         | 1              | 10.7                        | 18.4                                     | 8                    |
| A2.5C2.5-6                     | ~    | 50                                 | 18.6                          | 20           | 0.9            | 2.7                         | 54.7                                     | 9                    |
| P5M3B                          | 27.6 | 50                                 | 146                           | 15           | 9.7            | 11.3                        | ~                                        | 10                   |
| PI                             | 34   | 50                                 | 84                            | 40           | 2.1            | 8.6                         | 84                                       | <b>This<br/>work</b> |
| SiO <sub>2</sub> /PI-1         | 43   | 50                                 | 52.9                          | 90           | 0.6            | 6.2                         | 59                                       |                      |
| SiO <sub>2</sub> /PI-2         | 44   | 50                                 | 42.2                          | 105          | 0.4            | 5.2                         | 44                                       |                      |
| SiO <sub>2</sub> /PI-3         | 47   | 50                                 | 36.6                          | 115          | 0.3            | 4.1                         | 29                                       |                      |
| SiO <sub>2</sub> /PI-4         | 48   | 50                                 | 30.7                          | 130          | 0.2            | 3.2                         | 20                                       |                      |

181

182



183

184 **References**

185 1 H. B. Chen, X. L. Li, M. J. Chen, Y. R. He, H. B. Zhao, *Carbohydr. Polym.*, 2019,  
186 **206**, 609-615.

187 2 Y. X. Wei, C. Deng, H. Chen, L. Wan, W. C. Wei, Y. Z. Wang, *ACS Appl. Mater.*  
188 *Interfaces*, 2018, **10**, 28036-28050.

189 3 S. X. Wang, H. B. Zhao, W. H. Rao, S. C. Huang, T. Wang, W. Liao, Y. Z. Wang,  
190 *Polymer*, 2018, **153**, 616-625.

191 4 H. B. Chen, P. Shen, M. J. Chen, H. B. Zhao, D. A. Schiraldi, *ACS Appl. Mater.*  
192 *Interfaces*, 2016, **8**, 32557-32564.

193 5 Z. L. Yu, N. Yang, V. Apostolopoulou-Kalkavoura, B. Qin, Z. Y. Ma, W. Y.  
194 Xing, C. Qiao, L. Bergström, M. Antonietti, S. H. Yu, *Angew. Chem., Int. Ed.*, 2018,  
195 **57**, 4538-4542.

196 6 H. Y. Xie, W. Yang, A. C. Y. Yuen, C. Xie, J. S. Xie, H. D. Lu, G. H. Yeoh, *Chem.*  
197 *Eng. J.*, 2017, **311**, 310-317.

198 7 L. Wang, S. H. Wu, X. Y. Dong, R. Wang, L. Q. Zhang, J. L. Wang, J. Zhong, L. X.  
199 Wu, X. Wang, *J. Mater. Chem. A*, 2018, **6**, 4449-4457.

200 8 L. Z. Zuo, W. Fan, Y. F. Zhang, L. Zhang, W. Gao, Y. P. Huang, T. X. Liu,  
201 *Compos. Sci. Technol.*, 2016, 139, 57-63.

202 9 X. L. Li, M. J. Chen, H. B. Chen, *Compos. Part B: Eng.*, 2019, 164, 18-25.

203 10 K. Shang, D. D. Ye, A. H. Kang, Y. T. Wang, W. Liao, S. Xu, Y. Z. Wang,  
204 *Polymer*, 2017, **131**, 111-119.
